# Supplementary material for: Digital Pathology and PD-L1 Testing in Non Small Cell Lung Cancer: A Workshop Record
Source: PubMed Central journal article supplement (PMC7408471; doi:10.3390/cancers12071800), 2020-07-05
Supplement: cancers-12-01800-s001.pdf [file cancers-12-01800-s001.pdf]

## Supplementary Materials:

# Digital Pathology and PD-L1 Testing in Non Small Cell Lung Cancer: A Workshop Record

Fabio Pagni, Umberto Malapelle, Claudio Doglioni, Gabriella Fontanini, Filippo Frassetto, Paolo Graziano, Antonio Marchetti, Elena Guerini Rocco, Pasquale Pisapia, Elena Vigliar, Fiamma Buttitta, Marta Jaconi, Nicola Fusco, Massimo Barberis and Giancarlo Troncone

**Table S1.** Original PD-L1 evaluation, expert board consensus and prevalent scoring for every group; discrepancies between the original evaluation and the panel are highlighted in orange; participants errors in yellow.

| CASES | ORIGINAL INSTITUTION | EXPERT BOARD | ORANGE | RED   | VIOLET | GREEN | PINK  | BLUE  | YELLOW |
|-------|----------------------|--------------|--------|-------|--------|-------|-------|-------|--------|
| 1     | 1-49%                | 1-49%        | 1-49%  | 1-49% | 1-49%  | 1-49% | 1-49% | 1-49% | 1-49%  |
| 2     | ≥50%                 | ≥50%         | 1-49%  | ≥50%  | ≥50%   | ≥50%  | ≥50%  | ≥50%  | 1-49%  |
| 3     | <1%                  | <1%          | <1%    | <1%   | <1%    | <1%   | <1%   | 1-49% | <1%    |
| 4     | 1-49%                | 1-49%        | <1%    | 1-49% | 1-49%  | 1-49% | 1-49% | 1-49% | 1-49%  |
| 5     | ≥50%                 | ≥50%         | ≥50%   | ≥50%  | ≥50%   | ≥50%  | ≥50%  | ≥50%  | ≥50%   |
| 6     | <1%                  | <1%          | <1%    | 1-49% | 1-49%  | <1%   | 1-49% | <1%   | 1-49%  |
| 7     | 1-49%                | ≥50%         | ≥50%   | ≥50%  | ≥50%   | ≥50%  | ≥50%  | ≥50%  | ≥50%   |
| 8     | ≥50%                 | ≥50%         | ≥50%   | ≥50%  | ≥50%   | ≥50%  | ≥50%  | ≥50%  | ≥50%   |
| 9     | 1-49%                | 1-49%        | 1-49%  | 1-49% | 1-49%  | <1%   | 1-49% | 1-49% | <1%    |
| 10    | <1%                  | <1%          | <1%    | 1-49% | <1%    | <1%   | <1%   | <1%   | <1%    |
| 11    | 1-49%                | 1-49%        | 1-49%  | 1-49% | 1-49%  | <1%   | 1-49% | <1%   | <1%    |
| 12    | 1-49%                | 1-49%        | 1-49%  | 1-49% | 1-49%  | 1-49% | 1-49% | 1-49% | 1-49%  |
| 14    | ≥50%                 | ≥50%         | ≥50%   | ≥50%  | ≥50%   | ≥50%  | ≥50%  | ≥50%  | ≥50%   |
| 15    | ≥50%                 | ≥50%         | ≥50%   | ≥50%  | ≥50%   | ≥50%  | ≥50%  | ≥50%  | ≥50%   |
| 16    | <1%                  | 1-49%        | 1-49%  | 1-49% | 1-49%  | 1-49% | 1-49% | 1-49% | 1-49%  |
| 17    | 1-49%                | 1-49%        | <1%    | 1-49% | 1-49%  | 1-49% | 1-49% | <1%   | 1-49%  |
| 20    | ≥50%                 | ≥50%         | ≥50%   | ≥50%  | ≥50%   | ≥50%  | ≥50%  | ≥50%  | ≥50%   |
| 22    | 1-49%                | <1%          | 1-49%  | 1-49% | 1-49%  | 1-49% | 1-49% | 1-49% | 1-49%  |
| 30    | <1%                  | <1%          | <1%    | <1%   | <1%    | <1%   | <1%   | <1%   | <1%    |
| 33    | 1-49%                | 1-49%        | 1-49%  | 1-49% | 1-49%  | 1-49% | 1-49% | 1-49% | 1-49%  |
| 34    | ≥50%                 | ≥50%         | ≥50%   | ≥50%  | ≥50%   | ≥50%  | ≥50%  | ≥50%  | ≥50%   |
| 35    | <1%                  | <1%          | <1%    | <1%   | <1%    | <1%   | <1%   | <1%   | <1%    |
| 36    | <1%                  | <1%          | <1%    | <1%   | <1%    | <1%   | <1%   | <1%   | 1-49%  |
| 37    | ≥50%                 | ≥50%         | 1-49%  | 1-49% | 1-49%  | 1-49% | ≥50%  | 1-49% | ≥50%   |
| 38    | 1-49%                | 1-49%        | 1-49%  | 1-49% | 1-49%  | 1-49% | 1-49% | 1-49% | 1-49%  |
| 41    | <1%                  | 1-49%        | 1-49%  | 1-49% | 1-49%  | 1-49% | <1%   | 1-49% | 1-49%  |
| 45    | 1-49%                | 1-49%        | 1-49%  | 1-49% | 1-49%  | 1-49% | 1-49% | 1-49% | 1-49%  |
| 50    | ≥50%                 | 1-49%        | 1-49%  | ≥50%  | 1-49%  | 1-49% | ≥50%  | ≥50%  | 1-49%  |
| 51    | ≥50%                 | 1-49%        | ≥50%   | ≥50%  | 1-49%  | 1-49% | 1-49% | ≥50%  | ≥50%   |
| 52    | ≥50%                 | 1-49%        | 1-49%  | ≥50%  | ≥50%   | ≥50%  | 1-49% | ≥50%  | 1-49%  |
| 54    | <1%                  | 1-49%        | 1-49%  | ≥50%  | 1-49%  | 1-49% | 1-49% | 1-49% | 1-49%  |
| 55    | 1-49%                | 1-49%        | 1-49%  | 1-49% | 1-49%  | 1-49% | 1-49% | 1-49% | 1-49%  |



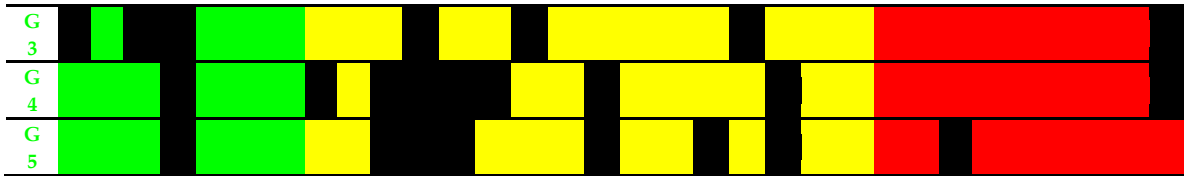

Table S3. Performances by histotype.

|                                                      | R(n=5)     | Y (n=5) | O (n=5)    | V(n=5) | B (n=6)   | P(n=6)     | G(n=5) |
|------------------------------------------------------|------------|---------|------------|--------|-----------|------------|--------|
| <b>Adenocarcinoma (n = 22)</b>                       |            |         |            |        |           |            |        |
| 1                                                    | >          |         |            | <      | <         |            | <      |
| 2                                                    |            |         |            |        |           |            |        |
| 4                                                    | <          |         | <(3)       |        | >(1);<(1) | <          |        |
| 5                                                    |            |         |            |        |           |            |        |
| 6                                                    |            |         |            |        |           |            |        |
| 7                                                    |            |         |            |        |           |            |        |
| 9                                                    |            | <(3)    |            | >      | <         |            | <(3)   |
| 10                                                   |            |         |            |        |           |            |        |
| 11                                                   | <(1); >(1) | <(4)    | <(2)       | <      | <(4)      | <(2)       | <(5)   |
| 12                                                   |            |         |            | >      |           |            | >(2)   |
| 14                                                   |            |         |            |        |           |            |        |
| 15                                                   |            |         |            |        |           |            |        |
| 22                                                   |            |         |            |        |           |            |        |
| 30                                                   |            |         |            |        |           |            |        |
| 34                                                   |            |         |            |        |           |            |        |
| 35                                                   |            |         |            |        |           |            |        |
| 36                                                   |            |         |            |        |           |            |        |
| 41                                                   |            |         |            |        |           | <(5)       |        |
| 50                                                   | >(3)       | >(2)    | >(2); <(1) |        | >(4)      | >(4)       | >(2)   |
| 52                                                   | >(4)       |         |            | >(5)   | >(3)      | >(2)       | >3     |
| 54                                                   | >(4)       |         |            |        |           | >(1); <(1) |        |
| 55                                                   | >          |         |            |        |           |            |        |
| <b>Squamous cell carcinoma / NSCLC, NOS (n = 10)</b> |            |         |            |        |           |            |        |
| 3                                                    |            |         |            |        |           |            |        |
| 8                                                    |            |         |            |        |           |            |        |
| 16                                                   | >          |         |            |        | >         |            | >      |
| 17                                                   | <          |         | <(3)       |        | <(4)      |            | <(2)   |
| 20                                                   |            |         |            |        |           |            |        |
| 33                                                   | >          |         |            |        |           |            |        |
| 37                                                   |            |         |            |        |           |            |        |
| 38                                                   |            |         |            | <      |           |            | <(2)   |
| 45                                                   |            |         |            |        |           |            |        |
| 51                                                   | >(5)       | >(3)    | >(3); <(1) |        | >(5)      | >(2)       | >      |

Table S4. Performances by clone.

|               | R (n=5)    | Y (n=5) | O (n=5)    | V (n=5) | B (n=6)   | P (n=6)    | G (n=5) |
|---------------|------------|---------|------------|---------|-----------|------------|---------|
| 22C3 (n = 23) |            |         |            |         |           |            |         |
| 1             | >          |         |            | <       | <         |            | <       |
| 2             |            |         |            |         |           |            |         |
| 3             |            |         |            |         |           |            |         |
| 4             | <          |         | <(3)       |         | >(1);<(1) | <          |         |
| 5             |            |         |            |         |           |            |         |
| 6             |            |         |            |         |           |            |         |
| 7             |            |         |            |         |           |            |         |
| 8             |            |         |            |         |           |            |         |
| 9             |            | <(3)    |            | >       | <         |            | <(3)    |
| 10            |            |         |            |         |           |            |         |
| 11            | <(1); >(1) | <(4)    | <(2)       | <       | <(4)      | <(2)       | <(5)    |
| 12            |            |         |            | >       |           |            | >(2)    |
| 14            |            |         |            |         |           |            |         |
| 15            |            |         |            |         |           |            |         |
| 16            | >          |         |            |         | >         |            | >       |
| 17            | <          |         | <(3)       |         | <(4)      |            | <(2)    |
| 20            |            |         |            |         |           |            |         |
| 22            |            |         |            |         |           |            |         |
| 33            | >          |         |            |         |           |            |         |
| 34            |            |         |            |         |           |            |         |
| 35            |            |         |            |         |           |            |         |
| 54            | >(4)       |         |            |         |           | >(1); <(1) |         |
| 55            | >          |         |            |         |           |            |         |
| SP263 (n = 9) |            |         |            |         |           |            |         |
| 30            |            |         |            |         |           |            |         |
| 36            |            |         |            |         |           |            |         |
| 37            |            |         |            |         |           |            |         |
| 38            |            |         |            | <       |           |            | <(2)    |
| 41            |            |         |            |         |           | <(5)       |         |
| 45            |            |         |            |         |           |            |         |
| 50            | >(3)       | >(2)    | >(2); <(1) |         | >(4)      | >(4)       | >(2)    |
| 51            | >(5)       | >(3)    | >(3); <(1) |         | >(5)      | >(2)       | >       |
| 52            | >(4)       |         |            | >(5)    | >(3)      | >(2)       | >3      |
